# Supplementary material
Source: publisher figshare collection journal article supplement (https://karger.figshare.com/ndownloader/files/32904248)
Supplement: Supplementary file 1 [file 32904248]

**Supplementary file 1.** Search strategy

PubMed

**History and Search Details**

Øverst på formularen

Download

Nederst på formularen

Delete

| **Search** | **Actions** | **Details** | **Query** | **Results** | **Time** |
| --- | --- | --- | --- | --- | --- |
| #1 |  |  | Search: **((("full field" OR "full-field") AND (electroretinogr* OR (electro AND retinogr*))) OR (ffERG OR "ff ERG")) AND ("macular degeneration" OR AMD OR ARMD)** Sort by: **Most Recent**  ((("full-field"[All Fields] OR "full-field"[All Fields]) AND ("electroretinogr*"[All Fields] OR ("electro"[All Fields] AND "retinogr*"[All Fields]))) OR ("fferg"[All Fields] OR "ffergs"[All Fields] OR "ff ERG"[All Fields])) AND ("macular degeneration"[All Fields] OR ("arch med deporte"[Journal] OR "amd"[All Fields]) OR "ARMD"[All Fields])  **Translations**  **ffERG:** "fferg"[All Fields] OR "ffergs"[All Fields]  **AMD:** "Arch Med Deporte"[Journal:__jid9112189] OR "amd"[All Fields] | [142](https://pubmed.ncbi.nlm.nih.gov/?term=%28%28%28%22full+field%22+OR+%22full-field%22%29+AND+%28electroretinogr%2A+OR+%28electro+AND+retinogr%2A%29%29%29+OR+%28ffERG+OR+%22ff+ERG%22%29%29+AND+%28%22macular+degeneration%22+OR+AMD+OR+ARMD%29&sort=date) | 14:03:45 |

Showing 1 to 1 of 1 entries

EMBASE

**Search History**

 (17searches found)

| | Search history sorted by search number ascending | | | | | | | | | | | | | --- | --- | --- | --- | --- | --- | --- | --- | --- | --- | --- | --- | |  | [# ▲](https://ovidsp-dc1-ovid-com.ep.fjernadgang.kb.dk/ovid-b/ovidweb.cgi?&S=FNKPFPACBBACAMMKKPPJPHDKMFDMAA00&Sort+Sets=descending) | **Searches** | | **Results** | | **Type** | | **Actions** | | **Annotations** | | |  | | | | | | | | | | | | |  | 1 | "full field".mp. [mp=title, abstract, heading word, drug trade name, original title, device manufacturer, drug manufacturer, device trade name, keyword, floating subheading word, candidate term word] | 5863 | | Advanced | | [Display Results](https://ovidsp-dc1-ovid-com.ep.fjernadgang.kb.dk/ovid-b/ovidweb.cgi?&S=FNKPFPACBBACAMMKKPPJPHDKMFDMAA00&SELECT=S.sh%7c&R=1&Process+Action=display)  More | | [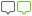](https://ovidsp-dc1-ovid-com.ep.fjernadgang.kb.dk/ovid-b/ovidweb.cgi?&S=FNKPFPACBBACAMMKKPPJPHDKMFDMAA00&R=1&Search+Annotations+Options=SA) | | |  | 2 | "full-field".mp. [mp=title, abstract, heading word, drug trade name, original title, device manufacturer, drug manufacturer, device trade name, keyword, floating subheading word, candidate term word] | 5863 | | Advanced | | [Display Results](https://ovidsp-dc1-ovid-com.ep.fjernadgang.kb.dk/ovid-b/ovidweb.cgi?&S=FNKPFPACBBACAMMKKPPJPHDKMFDMAA00&SELECT=S.sh%7c&R=2&Process+Action=display)  More | | [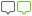](https://ovidsp-dc1-ovid-com.ep.fjernadgang.kb.dk/ovid-b/ovidweb.cgi?&S=FNKPFPACBBACAMMKKPPJPHDKMFDMAA00&R=2&Search+Annotations+Options=SA) | | |  | 3 | electroretinogr*.mp. [mp=title, abstract, heading word, drug trade name, original title, device manufacturer, drug manufacturer, device trade name, keyword, floating subheading word, candidate term word] | 24736 | | Advanced | | [Display Results](https://ovidsp-dc1-ovid-com.ep.fjernadgang.kb.dk/ovid-b/ovidweb.cgi?&S=FNKPFPACBBACAMMKKPPJPHDKMFDMAA00&SELECT=S.sh%7c&R=3&Process+Action=display)  More | | [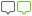](https://ovidsp-dc1-ovid-com.ep.fjernadgang.kb.dk/ovid-b/ovidweb.cgi?&S=FNKPFPACBBACAMMKKPPJPHDKMFDMAA00&R=3&Search+Annotations+Options=SA) | | |  | 4 | electro.mp. [mp=title, abstract, heading word, drug trade name, original title, device manufacturer, drug manufacturer, device trade name, keyword, floating subheading word, candidate term word] | 27477 | | Advanced | | [Display Results](https://ovidsp-dc1-ovid-com.ep.fjernadgang.kb.dk/ovid-b/ovidweb.cgi?&S=FNKPFPACBBACAMMKKPPJPHDKMFDMAA00&SELECT=S.sh%7c&R=4&Process+Action=display)  More | | [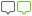](https://ovidsp-dc1-ovid-com.ep.fjernadgang.kb.dk/ovid-b/ovidweb.cgi?&S=FNKPFPACBBACAMMKKPPJPHDKMFDMAA00&R=4&Search+Annotations+Options=SA) | | |  | 5 | retinogr*.mp. [mp=title, abstract, heading word, drug trade name, original title, device manufacturer, drug manufacturer, device trade name, keyword, floating subheading word, candidate term word] | 831 | | Advanced | | [Display Results](https://ovidsp-dc1-ovid-com.ep.fjernadgang.kb.dk/ovid-b/ovidweb.cgi?&S=FNKPFPACBBACAMMKKPPJPHDKMFDMAA00&SELECT=S.sh%7c&R=5&Process+Action=display)  More | | [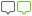](https://ovidsp-dc1-ovid-com.ep.fjernadgang.kb.dk/ovid-b/ovidweb.cgi?&S=FNKPFPACBBACAMMKKPPJPHDKMFDMAA00&R=5&Search+Annotations+Options=SA) | | |  | 6 | ffERG.mp. [mp=title, abstract, heading word, drug trade name, original title, device manufacturer, drug manufacturer, device trade name, keyword, floating subheading word, candidate term word] | 191 | | Advanced | | [Display Results](https://ovidsp-dc1-ovid-com.ep.fjernadgang.kb.dk/ovid-b/ovidweb.cgi?&S=FNKPFPACBBACAMMKKPPJPHDKMFDMAA00&SELECT=S.sh%7c&R=6&Process+Action=display)  More | | [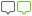](https://ovidsp-dc1-ovid-com.ep.fjernadgang.kb.dk/ovid-b/ovidweb.cgi?&S=FNKPFPACBBACAMMKKPPJPHDKMFDMAA00&R=6&Search+Annotations+Options=SA) | | |  | 7 | "ff ERG".mp. [mp=title, abstract, heading word, drug trade name, original title, device manufacturer, drug manufacturer, device trade name, keyword, floating subheading word, candidate term word] | 44 | | Advanced | | [Display Results](https://ovidsp-dc1-ovid-com.ep.fjernadgang.kb.dk/ovid-b/ovidweb.cgi?&S=FNKPFPACBBACAMMKKPPJPHDKMFDMAA00&SELECT=S.sh%7c&R=7&Process+Action=display)  More | | [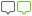](https://ovidsp-dc1-ovid-com.ep.fjernadgang.kb.dk/ovid-b/ovidweb.cgi?&S=FNKPFPACBBACAMMKKPPJPHDKMFDMAA00&R=7&Search+Annotations+Options=SA) | | |  | 8 | "macular degeneration".mp. [mp=title, abstract, heading word, drug trade name, original title, device manufacturer, drug manufacturer, device trade name, keyword, floating subheading word, candidate term word] | 33982 | | Advanced | | [Display Results](https://ovidsp-dc1-ovid-com.ep.fjernadgang.kb.dk/ovid-b/ovidweb.cgi?&S=FNKPFPACBBACAMMKKPPJPHDKMFDMAA00&SELECT=S.sh%7c&R=8&Process+Action=display)  More | | [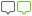](https://ovidsp-dc1-ovid-com.ep.fjernadgang.kb.dk/ovid-b/ovidweb.cgi?&S=FNKPFPACBBACAMMKKPPJPHDKMFDMAA00&R=8&Search+Annotations+Options=SA) | | |  | 9 | AMD.mp. [mp=title, abstract, heading word, drug trade name, original title, device manufacturer, drug manufacturer, device trade name, keyword, floating subheading word, candidate term word] | 21656 | | Advanced | | [Display Results](https://ovidsp-dc1-ovid-com.ep.fjernadgang.kb.dk/ovid-b/ovidweb.cgi?&S=FNKPFPACBBACAMMKKPPJPHDKMFDMAA00&SELECT=S.sh%7c&R=9&Process+Action=display)  More | | [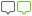](https://ovidsp-dc1-ovid-com.ep.fjernadgang.kb.dk/ovid-b/ovidweb.cgi?&S=FNKPFPACBBACAMMKKPPJPHDKMFDMAA00&R=9&Search+Annotations+Options=SA) | | |  | 10 | ARMD.mp. [mp=title, abstract, heading word, drug trade name, original title, device manufacturer, drug manufacturer, device trade name, keyword, floating subheading word, candidate term word] | 1222 | | Advanced | | [Display Results](https://ovidsp-dc1-ovid-com.ep.fjernadgang.kb.dk/ovid-b/ovidweb.cgi?&S=FNKPFPACBBACAMMKKPPJPHDKMFDMAA00&SELECT=S.sh%7c&R=10&Process+Action=display)  More | | [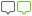](https://ovidsp-dc1-ovid-com.ep.fjernadgang.kb.dk/ovid-b/ovidweb.cgi?&S=FNKPFPACBBACAMMKKPPJPHDKMFDMAA00&R=10&Search+Annotations+Options=SA) | | |  | 11 | 1 or 2 | 5863 | | Advanced | | [Display Results](https://ovidsp-dc1-ovid-com.ep.fjernadgang.kb.dk/ovid-b/ovidweb.cgi?&S=FNKPFPACBBACAMMKKPPJPHDKMFDMAA00&SELECT=S.sh%7c&R=11&Process+Action=display)  More | | [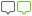](https://ovidsp-dc1-ovid-com.ep.fjernadgang.kb.dk/ovid-b/ovidweb.cgi?&S=FNKPFPACBBACAMMKKPPJPHDKMFDMAA00&R=11&Search+Annotations+Options=SA) | | |  | 12 | 4 and 5 | 114 | | Advanced | | [Display Results](https://ovidsp-dc1-ovid-com.ep.fjernadgang.kb.dk/ovid-b/ovidweb.cgi?&S=FNKPFPACBBACAMMKKPPJPHDKMFDMAA00&SELECT=S.sh%7c&R=12&Process+Action=display)  More | | [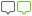](https://ovidsp-dc1-ovid-com.ep.fjernadgang.kb.dk/ovid-b/ovidweb.cgi?&S=FNKPFPACBBACAMMKKPPJPHDKMFDMAA00&R=12&Search+Annotations+Options=SA) | | |  | 13 | 3 or 12 | 24760 | | Advanced | | [Display Results](https://ovidsp-dc1-ovid-com.ep.fjernadgang.kb.dk/ovid-b/ovidweb.cgi?&S=FNKPFPACBBACAMMKKPPJPHDKMFDMAA00&SELECT=S.sh%7c&R=13&Process+Action=display)  More | | [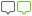](https://ovidsp-dc1-ovid-com.ep.fjernadgang.kb.dk/ovid-b/ovidweb.cgi?&S=FNKPFPACBBACAMMKKPPJPHDKMFDMAA00&R=13&Search+Annotations+Options=SA) | | |  | 14 | 6 or 7 | 228 | | Advanced | | [Display Results](https://ovidsp-dc1-ovid-com.ep.fjernadgang.kb.dk/ovid-b/ovidweb.cgi?&S=FNKPFPACBBACAMMKKPPJPHDKMFDMAA00&SELECT=S.sh%7c&R=14&Process+Action=display)  More | | [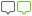](https://ovidsp-dc1-ovid-com.ep.fjernadgang.kb.dk/ovid-b/ovidweb.cgi?&S=FNKPFPACBBACAMMKKPPJPHDKMFDMAA00&R=14&Search+Annotations+Options=SA) | | |  | 15 | 11 and 13 | 2118 | | Advanced | | [Display Results](https://ovidsp-dc1-ovid-com.ep.fjernadgang.kb.dk/ovid-b/ovidweb.cgi?&S=FNKPFPACBBACAMMKKPPJPHDKMFDMAA00&SELECT=S.sh%7c&R=15&Process+Action=display)  More | | [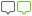](https://ovidsp-dc1-ovid-com.ep.fjernadgang.kb.dk/ovid-b/ovidweb.cgi?&S=FNKPFPACBBACAMMKKPPJPHDKMFDMAA00&R=15&Search+Annotations+Options=SA) | | |  | 16 | 8 or 9 or 10 | 41388 | | Advanced | | [Display Results](https://ovidsp-dc1-ovid-com.ep.fjernadgang.kb.dk/ovid-b/ovidweb.cgi?&S=FNKPFPACBBACAMMKKPPJPHDKMFDMAA00&SELECT=S.sh%7c&R=16&Process+Action=display)  More | | [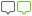](https://ovidsp-dc1-ovid-com.ep.fjernadgang.kb.dk/ovid-b/ovidweb.cgi?&S=FNKPFPACBBACAMMKKPPJPHDKMFDMAA00&R=16&Search+Annotations+Options=SA) | | |  | 17 | 15 and 16 | 195 | | Advanced | | [Display Results](https://ovidsp-dc1-ovid-com.ep.fjernadgang.kb.dk/ovid-b/ovidweb.cgi?&S=FNKPFPACBBACAMMKKPPJPHDKMFDMAA00&SELECT=S.sh%7c&R=17&Process+Action=display)  More | | [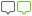](https://ovidsp-dc1-ovid-com.ep.fjernadgang.kb.dk/ovid-b/ovidweb.cgi?&S=FNKPFPACBBACAMMKKPPJPHDKMFDMAA00&R=17&Search+Annotations+Options=SA) | | |  | | |  | |  | |  | |  | | |
| --- | --- | --- | --- | --- | --- | --- | --- | --- | --- | --- | --- | --- | --- | --- | --- | --- | --- | --- | --- | --- | --- | --- | --- | --- | --- | --- | --- | --- | --- | --- | --- | --- | --- | --- | --- | --- | --- | --- | --- | --- | --- | --- | --- | --- | --- | --- | --- | --- | --- | --- | --- | --- | --- | --- | --- | --- | --- | --- | --- | --- | --- | --- | --- | --- | --- | --- | --- | --- | --- | --- | --- | --- | --- | --- | --- | --- | --- | --- | --- | --- | --- | --- | --- | --- | --- | --- | --- | --- | --- | --- | --- | --- | --- | --- | --- | --- | --- | --- | --- | --- | --- | --- | --- | --- | --- | --- | --- | --- | --- | --- | --- | --- | --- | --- | --- | --- | --- | --- | --- | --- | --- | --- | --- | --- | --- | --- | --- | --- | --- | --- | --- | --- | --- | --- | --- | --- | --- | --- | --- | --- | --- | --- | --- | --- | --- | --- | --- | --- | --- | --- | --- | --- | --- | --- | --- | --- | --- | --- | --- | --- | --- | --- | --- | --- | --- | --- | --- | --- | --- | --- | --- | --- | --- | --- | --- | --- | --- | --- | --- | --- | --- | --- | --- | --- | --- | --- | --- | --- | --- | --- | --- | --- | --- | --- | --- | --- | --- | --- | --- | --- | --- | --- | --- | --- | --- | --- | --- | --- | --- | --- | --- | --- | --- | --- | --- | --- | --- | --- | --- | --- | --- | --- | --- | --- | --- | --- | --- | --- | --- | --- | --- | --- | --- | --- |

Nederst på formularen

Cochrane Library

Search Name:

Date Run: 03/03/2021 19:25:04

Comment:

*ID Search Hits*

*#1 "full field" 186*

*#2 "full-field" 186*

*#3 electroretinogr* 537*

*#4 electro 1881*

*#5 retinogr* 46*

*#6 ffERG 13*

*#7 "ff ERG" 12*

*#8 "macular degeneration" 3368*

*#9 AMD 2493*

*#10 ARMD 173*

*#11 #1 OR #2 186*

*#12 #4 AND #5 11*

*#13 #3 OR #12 540*

*#14 #11 AND #13 68*

*#15 #6 OR #7 13*

*#16 #14 OR #15 71*

*#17 #8 OR #9 OR #10 3916*

*#18 #16 AND #17 6*

Web of Science Complete Collection (Web of Science Core Collection, BIOSIS Previews, Current Contents Connect, Data Citation Index, Derwent Innovations Index, KCI-Korean Journal Database, Russian Science Citation Index, and SciELO Citation Index)

### Results: 242

*(from All Databases)*

**You searched for:** **TOPIC:** (((("full field"  OR "full-field")  AND (electroretinogr*  OR (electro  AND retinogr*)))  OR (ffERG  OR "ff ERG"))  AND ("macular degeneration"  OR AMD  OR ARMD))

**Timespan:** All years.  **Databases:**  WOS, BIOSIS, CCC, DRCI, DIIDW, KJD, MEDLINE, RSCI, SCIELO, ZOOREC.

Search language=Auto
